# Supplementary material
Source: MDPI journal article supplement (https://www.mdpi.com/2073-4433/13/2/319)
Supplement: s1 [file s1 › atmosphere-1578982-supplementary.pdf]

# Contribution of Physical and Chemical Properties to Dithiothreitol-Measured Oxidative Potentials of Atmospheric Aerosol Particles at Urban and Rural Sites in Japan

Kazuki Kurihara <sup>1</sup>, Ayumi Iwata <sup>1,\*</sup>, Samuel Gray Murray Horwitz <sup>1</sup>, Kako Ogane <sup>1</sup>, Tomoki Sugioka <sup>1</sup>, Atsushi Matsuki <sup>2</sup>, Tomoaki Okuda <sup>1</sup>

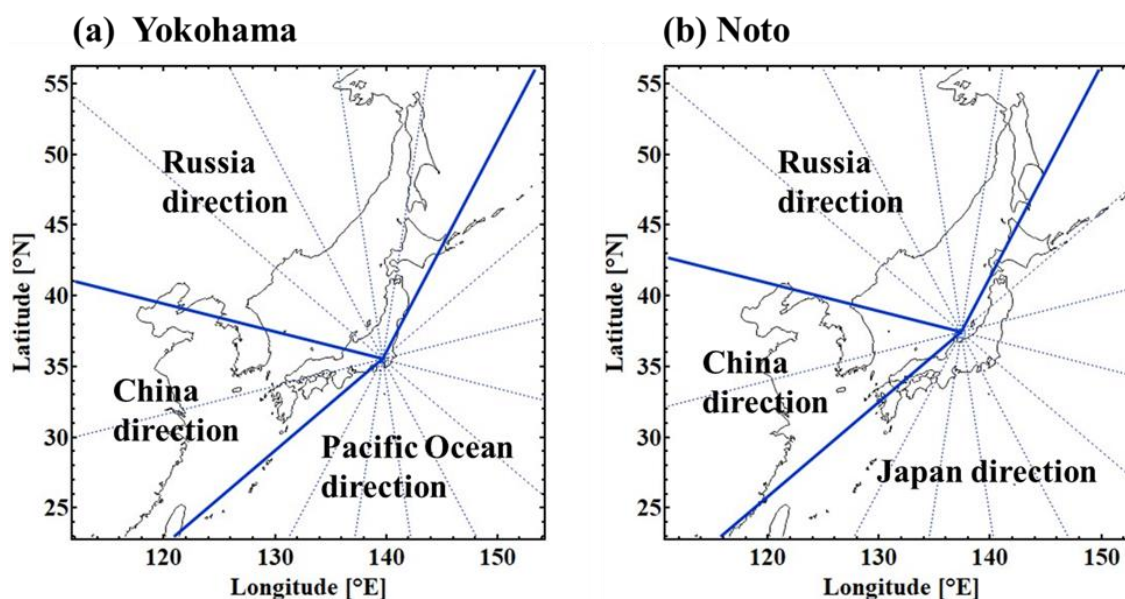

**Figure S1.** Classification maps of air mass backward trajectory at each observatory. The angles of each sector based on the line extended from each observation site to the east are as follows: (a) the Russia direction: 56.25–168.75°; (a) the China direction: 168.75–213.75°; (a) the Pacific Ocean / Japan direction: 0–56.25° and 213.75–360°. We calculated air mass positions every 1 hour and obtained 72 positions for each backward trajectory which were calculated from National Center for Atmospheric Research/National Centers for Environmental Prediction 2.5-deg global reanalysis data with vertical motion methods in NOAA HYSPLIT model. When >65% of 72 trajectory positions belong to a certain sector, we defined the air mass as that coming from that sector. Additionally, when a certain sector has the most positions but <65% (<46 positions) in trajectories, we used light colors in bar graphs of Fig. 2.

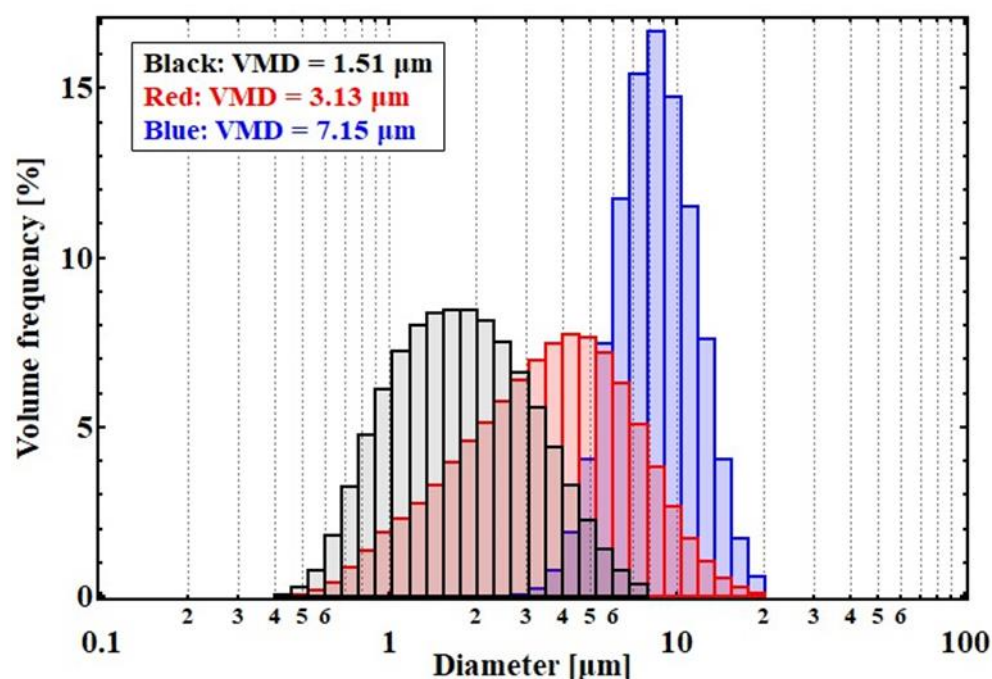

**Figure S2.** Size distributions of MnO<sub>2</sub> particles used in the laboratory experiment. The specific surface areas of the MnO<sub>2</sub> particles with volume median diameter of 1.51, 3.13, and 7.15 μm were 0.846, 0.482, and 0.164 m<sup>2</sup> g<sup>−1</sup>, respectively. These specific surface areas were calculated using the measured size distribution data and density of MnO<sub>2</sub> ( $\rho = 5.02 \text{ g cm}^{-3}$ ), assuming ideal spherical shape. Conditions of centrifugation are shown below. The MnO<sub>2</sub> particles were suspended in ultrapure water with density of  $\rho = 1.00 \text{ g cm}^{-3}$  and viscosity of  $\eta = 0.01 \text{ g cm}^{-1} \text{ s}^{-1}$ . The maximum and minimum slewing radii in centrifugation were 6.6 and 3.0 cm, respectively. The MnO<sub>2</sub> particles with VMD = 1.51 μm were obtained from the supernatant liquid when the suspension was centrifugally classified with revolution speed of 5000 rpm and centrifugation time of 13 sec. Those with VMD = 3.13 μm were acquired from the precipitate centrifugally classified with revolution speed of 1000 rpm and centrifugation time of 13 sec. Those with VMD = 7.15 μm were acquired from the precipitate when the suspension was centrifugally classified with revolution speed of 300 rpm and centrifugation time of 37 sec.

## (a) Yokohama (urban site)

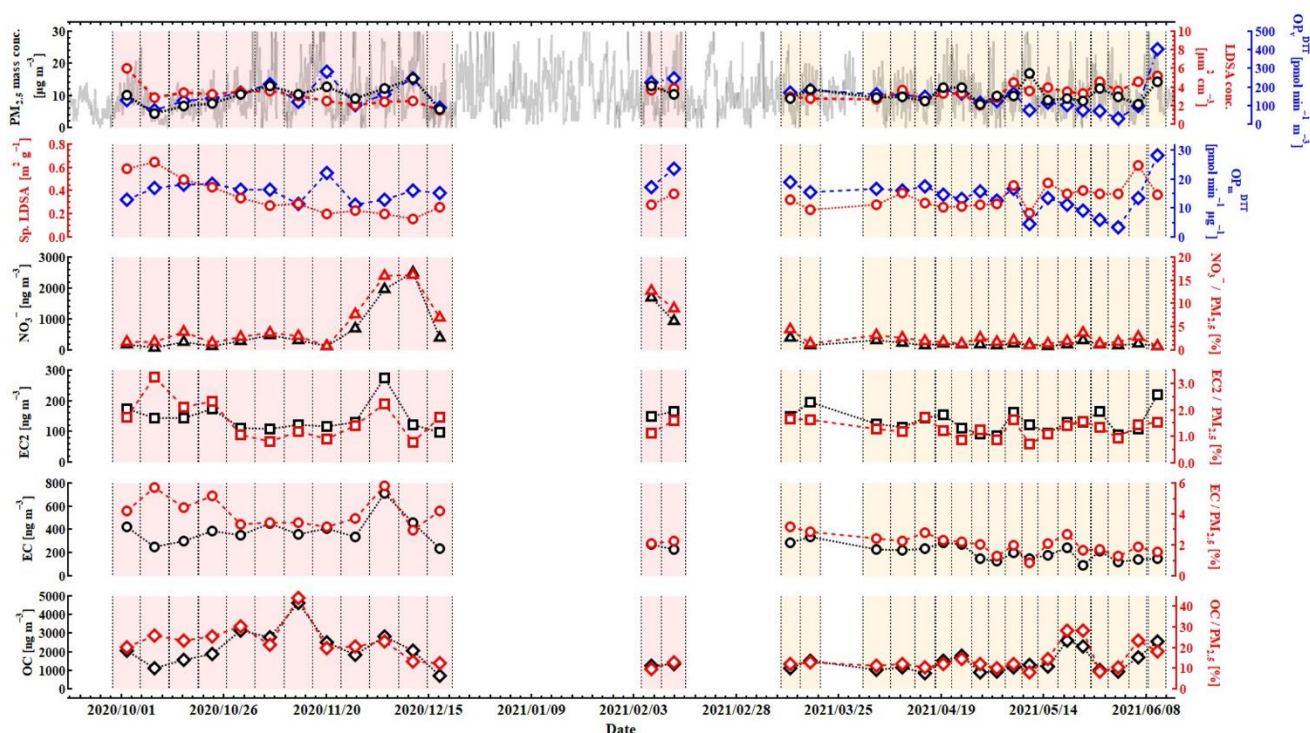

## (b) Noto (rural site)

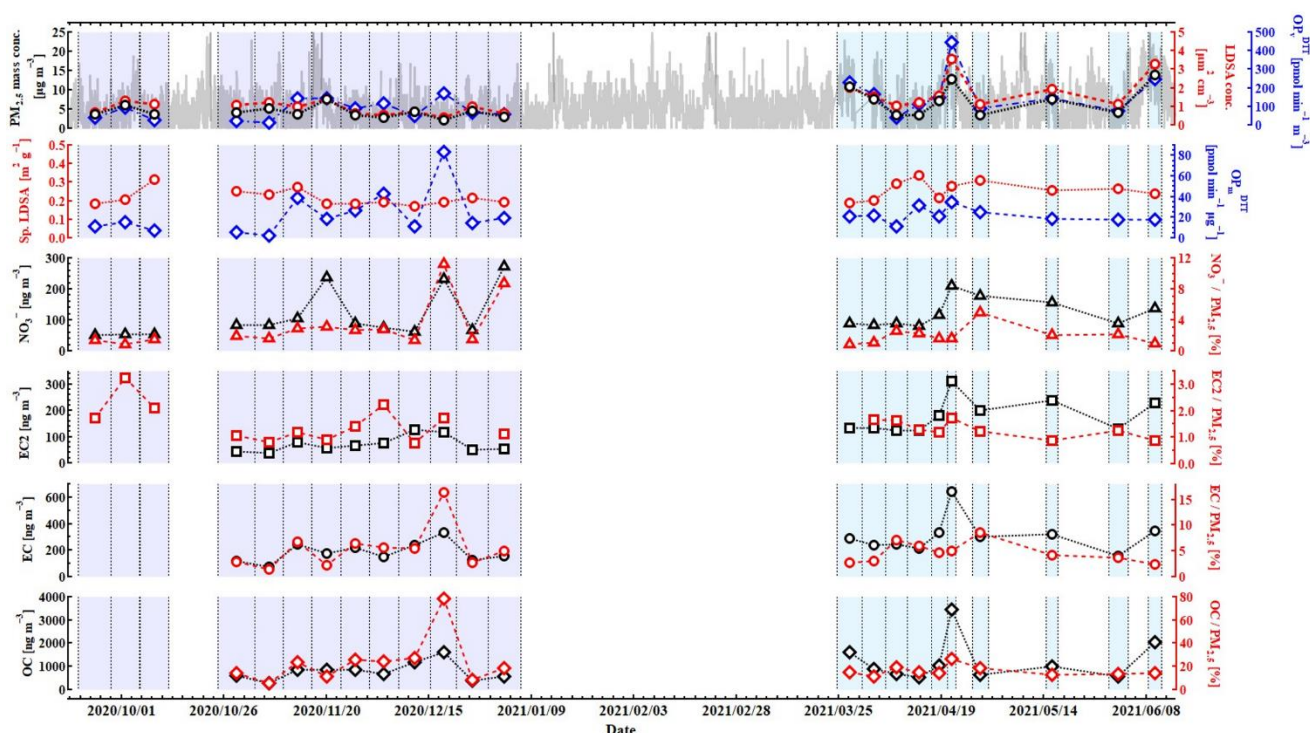

**Figure S3.** Temporal variations in physicochemical parameters and oxidative potentials at the two sites: (a) the urban Yokohama site; (b) the rural Noto site. Temporal variations in physicochemical parameters and oxidative potentials and at the two sites: (a) the urban Yokohama site; (b) the rural Noto site. Average PM<sub>2.5</sub> mass concentration (black), LDSA concentration (red), and OPvDTT (blue) are shown in the first layer. In the second layer, the specific LDSA (red) and OPmDTT (blue) are shown. Atmospheric concentrations (black) and the proportion (red) of NO<sub>3</sub><sup>-</sup>, EC<sub>2</sub>, total EC, and total OC are shown between the 3rd and 6th layers.

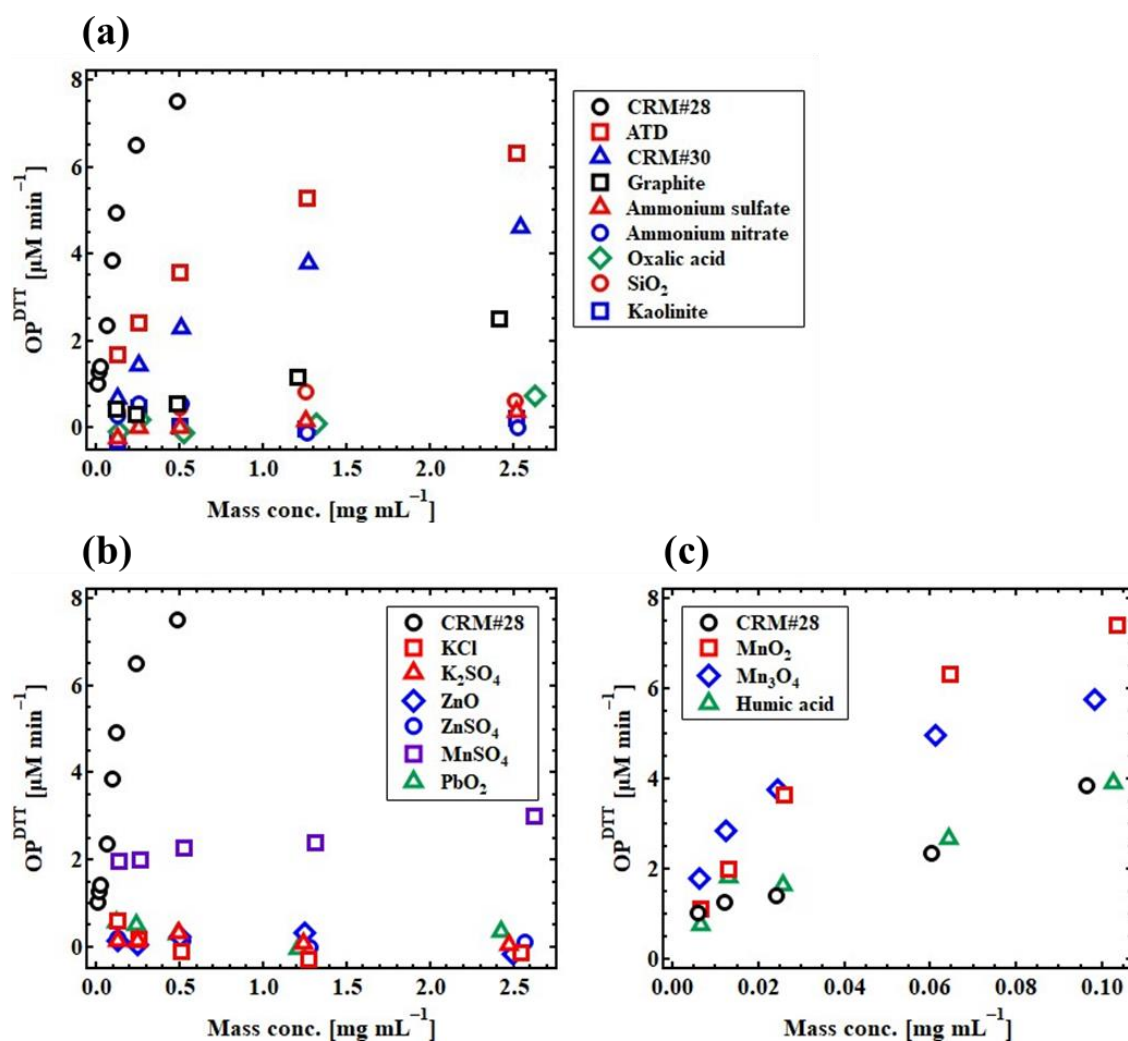

**Figure S4.** DTT activity of single component particles and standard materials: (a) CRM#28, ATD, CRM#30, graphite, ammonium sulfate, ammonium nitrate, oxalic acid, SiO<sub>2</sub>, and kaolinite; (b) KCl, K<sub>2</sub>SO<sub>4</sub>, ZnO, ZnSO<sub>4</sub>, MnSO<sub>4</sub>, and PbO<sub>2</sub> compared to CRM#28; (c) MnO<sub>2</sub>, Mn<sub>3</sub>O<sub>4</sub>, and humic acid compared to CRM#28.

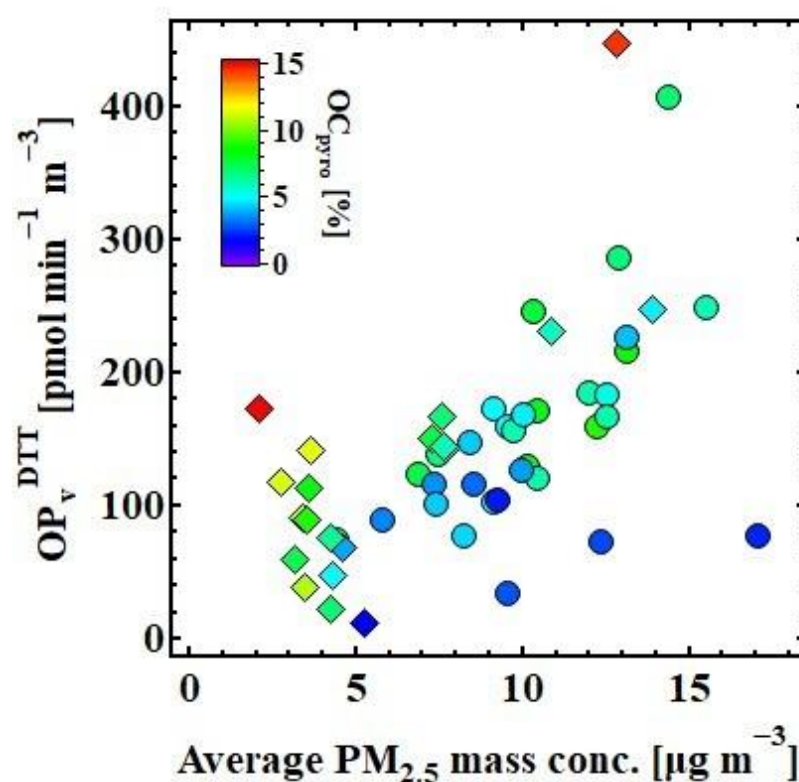

**Figure S5.** Relationship between the PM<sub>2.5</sub> mass concentration and  $\text{OP}_v^{\text{DTT}}$  colored by the proportion of OC<sub>pyro</sub>.

**Table S1.** Correlation matrix for  $\text{OP}_v^{\text{DTT}}$ , PM<sub>2.5</sub> mass concentration, LDSA concentration, and chemical components: (a) the Yokohama site in fall/winter; (b) the Yokohama site in spring; (c) the Noto site in fall/winter; (d) the Noto site in spring. The matrix of the Noto site in spring (d) excludes the data of the extremely high  $\text{OP}_v^{\text{DTT}}$  event.

(a) Yokohama (fall/winter)

| Parameter                     | PM <sub>2.5</sub> | LDSA   | OP <sub>2</sub> | Mg     | Al     | Si     | P      | S      | Cl     | K      | Ca     | Ti     | V      | Cr     | Mn     | Fe     | Ni     | Cu    | Zn     | Pb     | CT     | NO <sub>3</sub> <sup>-</sup> | SO <sub>4</sub> <sup>2-</sup> | Na <sup>+</sup> | NH <sub>4</sub> <sup>+</sup> | K <sup>+</sup> | Mg <sup>2+</sup> | Ca <sup>2+</sup> | BC     | OC     | EC     | TC     | OC1    | OC2    | OC3    | OC4    | OC <sub>pro</sub> | EC <sub>1,core,rel</sub> | EC2    | EC3    |        |
|-------------------------------|-------------------|--------|-----------------|--------|--------|--------|--------|--------|--------|--------|--------|--------|--------|--------|--------|--------|--------|-------|--------|--------|--------|------------------------------|-------------------------------|-----------------|------------------------------|----------------|------------------|------------------|--------|--------|--------|--------|--------|--------|--------|--------|-------------------|--------------------------|--------|--------|--------|
| PM <sub>2.5</sub> mass conc.  | 1.000             | 0.123  | 0.815           | 0.317  | 0.652  | 0.630  | 0.760  | 0.431  | 0.644  | 0.549  | 0.718  | 0.728  | 0.489  | 0.396  | 0.784  | 0.756  | 0.535  | 0.723 | 0.734  | 0.595  | 0.190  | 0.650                        | 0.541                         | 0.055           | 0.898                        | 0.365          | 0.196            | 0.339            | 0.711  | 0.143  | 0.523  | 0.448  | 0.323  | 0.097  | 0.535  | 0.592  | 0.801             | 0.610                    | 0.067  | -0.072 |        |
| LDSA conc.                    | 0.123             | 1.000  | 0.111           | 0.538  | 0.815  | 0.257  | -0.004 | 0.473  | -0.247 | -0.119 | 0.009  | -0.051 | -0.015 | -0.007 | -0.166 | -0.038 | 0.118  | 0.124 | -0.066 | -0.147 | -0.287 | -0.207                       | 0.689                         | -0.068          | 0.267                        | 0.216          | 0.670            | 0.748            | 0.065  | 0.086  | -0.018 | 0.079  | 0.062  | 0.014  | -0.064 | -0.040 | 0.301             | -0.100                   | 0.175  | 0.006  |        |
| OP <sub>2</sub>               | 0.815             | 0.111  | 1.000           | 0.592  | 0.687  | 0.618  | 0.652  | 0.693  | 0.356  | 0.714  | 0.819  | 0.816  | 0.460  | 0.268  | 0.798  | 0.779  | 0.313  | 0.593 | 0.740  | 0.836  | -0.303 | 0.429                        | 0.681                         | -0.050          | 0.720                        | 0.375          | -0.107           | 0.077            | 0.708  | 0.112  | 0.190  | 0.127  | 0.286  | -0.143 | 0.227  | 0.245  | 0.651             | 0.271                    | -0.059 | -0.424 |        |
| Mg                            | 0.317             | 0.558  | 0.592           | 1.000  | 0.706  | 0.289  | 0.162  | 0.915  | 0.094  | 0.586  | 0.491  | 0.482  | 0.330  | 0.318  | 0.440  | 0.604  | 0.332  | 0.389 | 0.476  | 0.350  | -0.558 | -0.319                       | 0.839                         | 0.105           | 0.347                        | 0.350          | 0.216            | 0.289            | 0.535  | 0.053  | -0.263 | 0.019  | 0.037  | -0.273 | -0.327 | 0.263  | 0.651             | -0.151                   | -0.369 | -0.333 |        |
| Al                            | 0.652             | 0.581  | 0.687           | 0.706  | 1.000  | 0.737  | 0.471  | 0.642  | 0.202  | 0.501  | 0.581  | 0.605  | 0.335  | 0.090  | 0.575  | 0.614  | 0.260  | 0.501 | 0.562  | 0.440  | -0.153 | 0.077                        | 0.783                         | 0.127           | 0.397                        | 0.519          | 0.307            | 0.421            | 0.580  | 0.348  | 0.189  | 0.348  | 0.194  | 0.171  | 0.204  | 0.182  | 0.586             | 0.278                    | -0.105 | -0.177 |        |
| Si                            | 0.630             | 0.257  | 0.488           | 0.289  | 0.737  | 1.000  | 0.382  | 0.240  | 0.092  | 0.199  | 0.696  | 0.663  | 0.383  | 0.057  | 0.415  | 0.367  | 0.535  | 0.224 | 0.297  | 0.232  | 0.005  | 0.472                        | -0.208                        | 0.605           | 0.138                        | -0.035         | 0.175            | 0.212            | 0.275  | 0.078  | 0.267  | 0.473  | 0.162  | 0.117  | 0.200  | 0.377  | 0.098             | -0.001                   | -0.022 |        |        |
| P                             | 0.760             | -0.004 | 0.652           | 0.162  | 0.471  | 0.382  | 1.000  | 0.151  | 0.451  | 0.340  | 0.340  | 0.304  | 0.121  | 0.124  | 0.595  | 0.518  | 0.388  | 0.519 | 0.523  | 0.613  | 0.082  | 0.539                        | 0.300                         | 0.013           | 0.661                        | 0.236          | 0.081            | 0.151            | 0.710  | 0.144  | 0.402  | 0.182  | 0.180  | -0.174 | 0.541  | 0.436  | 0.670             | 0.560                    | -0.142 | -0.305 |        |
| S                             | 0.431             | 0.473  | 0.693           | 0.915  | 0.642  | 0.240  | 0.151  | 1.000  | 0.207  | 0.729  | 0.562  | 0.306  | 0.452  | 0.334  | 0.571  | 0.681  | 0.225  | 0.564 | 0.642  | 0.603  | -0.248 | -0.157                       | 0.865                         | 0.176           | 0.404                        | 0.461          | 0.188            | 0.295            | 0.591  | 0.091  | -0.002 | 0.085  | -0.031 | -0.004 | -0.126 | -0.090 | 0.418             | 0.028                    | -0.054 | -0.265 |        |
| Cl                            | 0.644             | -0.247 | 0.536           | 0.094  | 0.202  | 0.092  | 0.451  | 0.207  | 1.000  | 0.541  | 0.376  | 0.427  | 0.581  | 0.630  | 0.693  | 0.715  | 0.610  | 0.683 | 0.717  | 0.387  | 0.385  | 0.399                        | 0.065                         | 0.314           | 0.515                        | 0.255          | 0.074            | 0.088            | 0.604  | 0.265  | 0.543  | 0.312  | 0.125  | 0.075  | 0.444  | 0.474  | 0.420             | 0.686                    | -0.066 | -0.041 |        |
| K                             | 0.549             | -0.119 | 0.714           | 0.586  | 0.501  | 0.199  | 0.340  | 0.729  | 0.541  | 1.000  | 0.620  | 0.673  | 0.544  | 0.237  | 0.907  | 0.903  | 0.126  | 0.723 | 0.918  | 0.826  | 0.027  | -0.019                       | 0.478                         | 0.404           | 0.353                        | 0.603          | -0.038           | -0.045           | 0.786  | 0.333  | 0.295  | 0.347  | -0.129 | 0.188  | 0.238  | 0.221  | 0.488             | 0.437                    | -0.173 | -0.164 |        |
| Ca                            | 0.718             | 0.009  | 0.819           | 0.491  | 0.581  | 0.696  | 0.340  | 0.562  | 0.376  | 0.620  | 1.000  | 0.900  | 0.714  | 0.481  | 0.717  | 0.766  | 0.410  | 0.418 | 0.597  | 0.640  | -0.238 | 0.387                        | 0.478                         | -0.208          | 0.534                        | 0.139          | -0.175           | 0.048            | 0.421  | 0.143  | 0.010  | 0.135  | 0.575  | 0.039  | 0.015  | 0.105  | 0.336             | 0.089                    | -0.156 | -0.230 |        |
| Ti                            | 0.728             | -0.051 | 0.816           | 0.482  | 0.605  | 0.663  | 0.504  | 0.306  | 0.427  | 0.673  | 0.900  | 1.000  | 0.716  | 0.328  | 0.764  | 0.780  | 0.376  | 0.404 | 0.669  | 0.767  | -0.168 | 0.351                        | 0.392                         | 0.014           | 0.481                        | 0.264          | -0.148           | -0.035           | 0.602  | 0.185  | 0.038  | 0.177  | 0.535  | 0.070  | 0.100  | 0.116  | 0.351             | 0.180                    | -0.296 | -0.197 |        |
| V                             | 0.489             | -0.015 | 0.469           | 0.330  | 0.335  | 0.383  | 0.121  | 0.452  | 0.581  | 0.544  | 0.714  | 0.716  | 1.000  | 0.598  | 0.604  | 0.646  | 0.570  | 0.507 | 0.601  | 0.399  | -0.028 | 0.314                        | 0.170                         | -0.101          | 0.353                        | -0.018         | -0.149           | -0.013           | 0.272  | -0.046 | 0.114  | -0.030 | 0.456  | -0.084 | -0.080 | 0.081  | 0.091             | 0.161                    | -0.047 | -0.101 |        |
| Cr                            | 0.396             | -0.007 | 0.268           | 0.318  | 0.090  | 0.057  | 0.124  | 0.334  | 0.630  | 0.237  | 0.481  | 0.238  | 0.598  | 1.000  | 0.361  | 0.526  | 0.859  | 0.342 | 0.348  | 0.145  | -0.222 | 0.300                        | 0.192                         | -0.253          | 0.359                        | -0.204         | -0.108           | 0.054            | 0.153  | -0.185 | -0.092 | -0.184 | 0.382  | -0.171 | -0.349 | -0.139 | -0.028            | 0.507                    | -0.229 | -0.246 |        |
| Mn                            | 0.784             | -0.166 | 0.798           | 0.440  | 0.575  | 0.415  | 0.295  | 0.571  | 0.693  | 0.907  | 0.717  | 0.764  | 0.604  | 0.361  | 1.000  | 0.950  | 0.380  | 0.812 | 0.962  | 0.781  | 0.134  | 0.333                        | 0.433                         | 0.242           | 0.612                        | 0.184          | -0.088           | -0.032           | 0.789  | 0.364  | 0.433  | 0.391  | 0.026  | 0.150  | 0.374  | 0.393  | 0.600             | 0.591                    | -0.139 | -0.161 |        |
| Fe                            | 0.756             | -0.038 | 0.779           | 0.604  | 0.614  | 0.367  | 0.518  | 0.681  | 0.715  | 0.903  | 0.766  | 0.780  | 0.646  | 0.526  | 0.950  | 1.000  | 0.459  | 0.761 | 0.916  | 0.787  | -0.074 | 0.186                        | 0.519                         | 0.224           | 0.545                        | 0.491          | 0.020            | 0.086            | 0.801  | 0.327  | 0.283  | 0.339  | 0.141  | 0.154  | 0.255  | 0.246  | 0.533             | 0.471                    | -0.281 | -0.228 |        |
| Ni                            | 0.535             | 0.118  | 0.513           | 0.232  | 0.260  | 0.255  | 0.368  | 0.225  | 0.610  | 0.126  | 0.410  | 0.376  | 0.570  | 0.859  | 0.380  | 0.459  | 1.000  | 0.389 | 0.394  | 0.070  | -0.118 | 0.546                        | 0.209                         | -0.253          | 0.385                        | -0.169         | -0.082           | 0.051            | 0.188  | -0.147 | 0.064  | -0.130 | 0.380  | -0.201 | -0.117 | 0.016  | 0.107             | 0.137                    | -0.131 | -0.200 |        |
| Cu                            | 0.723             | 0.143  | 0.593           | 0.389  | 0.501  | 0.224  | 0.519  | 0.564  | 0.683  | 0.724  | 0.418  | 0.404  | 0.507  | 0.342  | 0.812  | 0.761  | 0.389  | 1.000 | 0.865  | 0.509  | 0.238  | 0.305                        | 0.501                         | 0.192           | 0.679                        | 0.495          | 0.267            | 0.311            | 0.688  | 0.388  | 0.388  | 0.660  | 0.441  | -0.216 | 0.100  | 0.508  | 0.576             | 0.755                    | 0.733  | 0.161  | -0.032 |
| Zn                            | 0.734             | -0.066 | 0.740           | 0.476  | 0.562  | 0.297  | 0.523  | 0.442  | 0.717  | 0.918  | 0.397  | 0.669  | 0.601  | 0.348  | 0.962  | 0.916  | 0.394  | 0.865 | 1.000  | 0.724  | 0.193  | 0.277                        | 0.473                         | 0.355           | 0.622                        | 0.575          | -0.003           | 0.005            | 0.808  | 0.350  | 0.506  | 0.387  | -0.096 | 0.122  | 0.387  | 0.425  | 0.631             | 0.633                    | -0.036 | -0.148 |        |
| Pb                            | 0.595             | -0.147 | 0.826           | 0.530  | 0.440  | 0.232  | 0.613  | 0.603  | 0.387  | 0.826  | 0.640  | 0.767  | 0.399  | 0.145  | 0.781  | 0.787  | 0.070  | 0.509 | 0.724  | 1.000  | -0.123 | 0.101                        | 0.421                         | 0.195           | 0.334                        | 0.439          | -0.088           | -0.049           | 0.828  | 0.110  | 0.126  | 0.118  | 0.160  | -0.092 | 0.262  | 0.149  | 0.498             | 0.298                    | -0.304 | -0.405 |        |
| CT                            | 0.190             | -0.287 | -0.003          | -0.518 | -0.153 | 0.005  | 0.082  | -0.248 | 0.285  | 0.027  | -0.128 | -0.168 | -0.028 | -0.222 | 0.134  | -0.074 | -0.118 | 0.238 | 0.193  | -0.123 | 1.000  | 0.488                        | -0.206                        | 0.271           | 0.363                        | -0.028         | -0.063           | -0.006           | 0.019  | 0.158  | 0.798  | 0.241  | -0.178 | -0.063 | 0.586  | 0.740  | 0.358             | 0.612                    | 0.808  | 0.234  |        |
| NO <sub>3</sub> <sup>-</sup>  | 0.630             | 0.207  | 0.429           | 0.319  | 0.077  | 0.472  | 0.539  | -0.157 | 0.399  | -0.019 | 0.387  | 0.351  | 0.314  | 0.300  | 0.333  | 0.186  | 0.546  | 0.305 | 0.277  | 0.101  | 0.488  | 1.000                        | -0.033                        | -0.359          | 0.746                        | -0.232         | -0.089           | 0.086            | -0.053 | 0.428  | 0.000  | 0.387  | -0.287 | 0.345  | 0.524  | 0.383  | 0.366             | 0.366                    | -0.096 |        |        |
| SO <sub>4</sub> <sup>2-</sup> | 0.541             | 0.689  | 0.681           | 0.839  | 0.783  | 0.457  | 0.300  | 0.865  | 0.065  | 0.478  | 0.478  | 0.392  | 0.170  | 0.192  | 0.433  | 0.519  | 0.209  | 0.501 | 0.473  | 0.421  | -0.206 | -0.023                       | 1.000                         | 0.108           | 0.593                        | 0.482          | 0.395            | 0.538            | 0.548  | 0.270  | 0.074  | 0.262  | -0.028 | 0.117  | 0.019  | 0.043  | 0.599             | 0.076                    | 0.043  | -0.137 |        |
| Na <sup>+</sup>               | 0.035             | -0.068 | -0.050          | 0.105  | 0.127  | -0.208 | 0.013  | 0.176  | 0.314  | 0.404  | -0.208 | 0.014  | -0.101 | -0.253 | 0.242  | 0.224  | -0.253 | 0.192 | 0.355  | 0.195  | 0.271  | -0.359                       | 0.108                         | 1.000           | -0.038                       | 0.570          | 0.351            | 0.132            | 0.531  | 0.344  | 0.393  | 0.556  | -0.447 | 0.516  | 0.338  | 0.241  | 0.237             | 0.449                    | 0.026  | 0.409  |        |
| NH <sub>4</sub> <sup>+</sup>  | 0.898             | 0.267  | 0.720           | 0.247  | 0.597  | 0.605  | 0.661  | 0.404  | 0.515  | 0.353  | 0.534  | 0.481  | 0.353  | 0.359  | 0.612  | 0.545  | 0.385  | 0.679 | 0.622  | 0.334  | 0.463  | 0.746                        | 0.593                         | -0.038          | 1.000                        | 0.246          | 0.148            | 0.338            | 0.520  | 0.361  | 0.569  | 0.311  | 0.189  | -0.060 | 0.449  | 0.587  | 0.778             | 0.546                    | 0.343  | -0.094 |        |
| K <sup>+</sup>                | 0.365             | 0.216  | 0.575           | 0.450  | 0.519  | 0.138  | 0.256  | 0.461  | 0.255  | 0.603  | 0.139  | 0.264  | -0.018 | -0.204 | 0.484  | 0.491  | -0.169 | 0.495 | 0.575  | 0.439  | -0.028 | -0.232                       | 0.482                         | 0.570           | 0.246                        | 1.000          | 0.429            | 0.212            | 0.681  | 0.662  | 0.342  | 0.661  | -0.386 | 0.485  | 0.500  | 0.372  | 0.637             | 0.482                    | -0.166 | 0.044  |        |
| Mg <sup>2+</sup>              | 0.196             | 0.670  | -0.107          | 0.216  | 0.307  | -0.035 | 0.081  | 0.188  | 0.074  | -0.038 | -0.175 | -0.148 | -0.149 | -0.108 | -0.088 | 0.020  | -0.082 | 0.287 | -0.003 | -0.088 | -0.065 | -0.278                       | 0.395                         | 0.351           | 0.148                        | 0.429          | 1.000            | 0.910            | 0.291  | 0.375  | 0.366  | 0.582  | -0.119 | 0.437  | 0.434  | 0.367  | 0.485             | 0.363                    | 0.156  | 0.437  |        |
| Ca <sup>2+</sup>              | 0.339             | 0.748  | 0.077           | 0.289  | 0.421  | 0.175  | 0.151  | 0.295  | 0.088  | -0.045 | 0.048  | -0.035 | 0.013  | 0.054  | -0.032 | 0.086  | 0.051  | 0.311 | 0.005  | -0.049 | -0.006 | -0.089                       | 0.538                         | 0.132           | 0.338                        | 0.212          | 0.910            | 1.000            | 0.251  | 0.255  | 0.352  | 0.440  | 0.107  | 0.253  | 0.354  | 0.523  | 0.296             | 0.287                    | 0.310  |        |        |
| BC                            | 0.711             | 0.065  | 0.708           | 0.535  | 0.580  | 0.212  | 0.710  | 0.391  | 0.604  | 0.786  | 0.421  | 0.602  | 0.272  | 0.153  | 0.789  | 0.801  | 0.188  | 0.688 | 0.808  | 0.828  | 0.019  | 0.086                        | 0.548                         | 0.531           | 0.520                        | 0.681          | 0.291            | 0.251            | 1.000  | 0.425  |        |        |        |        |        |        |                   |                          |        |        |        |

(b) Yokohama (spring)

| Parameter                     | PM <sub>2.5</sub> | PM <sub>10</sub> | LDSC   | OP <sub>1</sub> | Mg     | Al     | Si     | P      | S      | Cl     | K      | Ca     | Ti     | V      | Cr     | Mn     | Fe     | Ni     | Cu     | Zn     | Pb     | Cr     | NO <sub>3</sub> <sup>-</sup> | SO <sub>4</sub> <sup>2-</sup> | Na <sup>+</sup> | NH <sub>4</sub> <sup>+</sup> | K <sup>+</sup> | Mg <sup>2+</sup> | Ca <sup>2+</sup> | BC     | OC     | EC     | TC     | OC1    | OC2    | OC3    | OC4    | OC <sub>geo</sub> | EC <sub>1,corrected</sub> | EC2    | EC3    |        |       |
|-------------------------------|-------------------|------------------|--------|-----------------|--------|--------|--------|--------|--------|--------|--------|--------|--------|--------|--------|--------|--------|--------|--------|--------|--------|--------|------------------------------|-------------------------------|-----------------|------------------------------|----------------|------------------|------------------|--------|--------|--------|--------|--------|--------|--------|--------|-------------------|---------------------------|--------|--------|--------|-------|
| PM <sub>2.5</sub> mass conc.  | 1.000             | 0.321            | 0.335  | 0.418           | 0.133  | 0.140  | -0.041 | -0.537 | -0.156 | 0.398  | 0.082  | 0.115  | -0.003 | -0.038 | 0.167  | 0.116  | -0.339 | 0.061  | 0.230  | 0.221  | -0.145 | -0.267 | 0.533                        | -0.381                        | 0.063           | 0.379                        | -0.467         | 0.330            | N/A              | 0.207  | 0.162  | 0.225  | 0.098  | -0.049 | 0.225  | 0.144  | 0.546  | -0.033            | 0.462                     | 0.069  |        |        |       |
| LDSC conc.                    | 0.321             | 1.000            | 0.297  | -0.289          | -0.519 | -0.501 | -0.553 | 0.266  | -0.525 | -0.204 | -0.352 | -0.464 | 0.007  | -0.272 | -0.127 | -0.010 | -0.412 | -0.286 | 0.277  | -0.119 | 0.883  | -0.271 | 0.389                        | -0.389                        | -0.271          | 0.389                        | -0.271         | 0.389            | -0.271           | 0.389  | -0.271 | 0.389  | -0.271 | 0.389  | -0.271 | 0.389  | -0.271 | 0.389             | -0.271                    | 0.389  | -0.271 | 0.389  |       |
| OP <sub>1</sub>               | 0.335             | 0.297            | 1.000  | 0.598           | 0.262  | 0.246  | 0.120  | 0.900  | 0.044  | 0.619  | 0.235  | 0.384  | 0.011  | 0.207  | 0.618  | 0.413  | -0.076 | 0.161  | 0.757  | 0.596  | -0.328 | -0.119 | 0.883                        | -0.271                        | 0.389           | -0.271                       | 0.389          | -0.271           | 0.389            | -0.271 | 0.389  | -0.271 | 0.389  | -0.271 | 0.389  | -0.271 | 0.389  | -0.271            | 0.389                     | -0.271 | 0.389  | -0.271 | 0.389 |
| Mg                            | 0.418             | -0.289           | 0.598  | 1.000           | 0.829  | 0.820  | 0.718  | 0.698  | 0.486  | 0.935  | 0.762  | 0.821  | 0.625  | 0.605  | 0.903  | 0.842  | -0.054 | 0.546  | 0.757  | 0.596  | -0.328 | -0.119 | 0.883                        | -0.271                        | 0.389           | -0.271                       | 0.389          | -0.271           | 0.389            | -0.271 | 0.389  | -0.271 | 0.389  | -0.271 | 0.389  | -0.271 | 0.389  | -0.271            | 0.389                     | -0.271 | 0.389  | -0.271 | 0.389 |
| Al                            | 0.133             | -0.519           | 0.262  | 0.829           | 1.000  | 0.995  | 0.920  | 0.310  | 0.642  | 0.868  | 0.879  | 0.932  | -0.021 | 0.814  | 0.868  | 0.940  | 0.168  | 0.600  | 0.574  | 0.126  | -0.176 | 0.373  | 0.368                        | 0.003                         | 0.435           | 0.817                        | 0.286          | 0.767            | N/A              | -0.249 | 0.558  | -0.180 | 0.315  | -0.491 | -0.106 | -0.488 | 0.444  | 0.620             | 0.059                     | -0.185 |        |        |       |
| Si                            | 0.140             | -0.501           | 0.246  | 0.820           | 0.995  | 1.000  | 0.902  | 0.299  | 0.593  | 0.854  | 0.852  | 0.935  | -0.041 | 0.837  | 0.869  | 0.920  | 0.135  | 0.575  | 0.565  | 0.085  | -0.208 | 0.395  | 0.372                        | -0.014                        | 0.318           | 0.801                        | 0.316          | 0.758            | N/A              | -0.237 | 0.573  | -0.166 | 0.331  | -0.466 | -0.122 | -0.436 | 0.426  | 0.620             | 0.088                     | -0.214 |        |        |       |
| P                             | -0.041            | -0.553           | 0.120  | 0.678           | 0.920  | 0.902  | 1.000  | 0.096  | 0.786  | 0.762  | 0.888  | 0.942  | -0.086 | 0.882  | 0.761  | 0.920  | 0.288  | 0.696  | 0.514  | 0.001  | -0.162 | 0.426  | 0.132                        | -0.007                        | 0.132           | 0.743                        | 0.257          | 0.652            | N/A              | -0.309 | 0.580  | -0.236 | 0.314  | -0.506 | -0.073 | 0.513  | 0.305  | 0.709             | -0.104                    | -0.167 |        |        |       |
| S                             | 0.337             | 0.266            | 0.900  | 0.698           | 0.310  | 0.299  | 0.096  | 1.000  | 0.045  | 0.663  | 0.242  | 0.277  | 0.489  | 0.251  | 0.594  | 0.390  | -0.165 | 0.232  | 0.723  | 0.655  | -0.319 | -0.147 | 0.970                        | -0.293                        | 0.866           | 0.582                        | -0.315         | 0.367            | N/A              | 0.381  | 0.098  | 0.391  | 0.221  | 0.017  | 0.220  | -0.111 | 0.869  | -0.042            | 0.600                     | 0.029  |        |        |       |
| Cl                            | -0.156            | -0.525           | 0.044  | 0.486           | 0.642  | 0.593  | 0.786  | 0.045  | 1.000  | 0.568  | 0.671  | 0.727  | -0.135 | 0.414  | 0.488  | 0.703  | 0.312  | 0.551  | 0.362  | 0.063  | 0.067  | 0.122  | 0.030                        | 0.178                         | 0.048           | 0.567                        | 0.170          | 0.412            | N/A              | -0.180 | 0.242  | -0.149 | 0.249  | -0.342 | 0.003  | -0.272 | 0.252  | 0.438             | -0.253                    | 0.117  |        |        |       |
| K                             | 0.398             | -0.204           | 0.619  | 0.935           | 0.868  | 0.854  | 0.762  | 0.663  | 1.000  | 0.798  | 0.871  | 0.192  | 0.639  | 0.900  | 0.905  | 0.004  | 0.522  | 0.785  | 0.359  | 0.359  | 0.126  | 0.694  | -0.277                       | 0.389                         | -0.271          | 0.389                        | -0.271         | 0.389            | -0.271           | 0.389  | -0.271 | 0.389  | -0.271 | 0.389  | -0.271 | 0.389  | -0.271 | 0.389             | -0.271                    | 0.389  | -0.271 | 0.389  |       |
| Ca                            | 0.082             | -0.532           | 0.235  | 0.762           | 0.879  | 0.852  | 0.888  | 0.242  | 0.671  | 0.798  | 1.000  | 0.856  | -0.014 | 0.552  | 0.769  | 0.877  | 0.194  | 0.666  | 0.605  | 0.083  | -0.131 | 0.373  | 0.275                        | -0.032                        | 0.398           | 0.795                        | 0.117          | 0.770            | N/A              | -0.266 | 0.625  | -0.188 | 0.390  | -0.519 | -0.116 | -0.525 | 0.466  | 0.743             | -0.009                    | -0.292 |        |        |       |
| Ti                            | 0.115             | -0.498           | 0.284  | 0.786           | 0.952  | 0.935  | 0.942  | 0.277  | 0.727  | 0.871  | 0.856  | 1.000  | -0.052 | 0.751  | 0.842  | 0.978  | 0.141  | 0.544  | 0.625  | 0.127  | -0.202 | 0.344  | 0.322                        | -0.056                        | 0.221           | 0.840                        | 0.231          | 0.667            | N/A              | -0.230 | 0.584  | -0.158 | 0.189  | -0.489 | -0.008 | -0.493 | 0.452  | 0.650             | 0.071                     | -0.091 |        |        |       |
| V                             | -0.003            | 0.325            | 0.611  | 0.225           | -0.021 | -0.041 | -0.086 | 0.489  | -0.135 | 0.192  | -0.014 | -0.052 | 1.000  | -0.051 | 0.226  | 0.069  | 0.306  | 0.043  | 0.259  | 0.291  | -0.186 | -0.248 | 0.482                        | -0.218                        | 0.484           | 0.177                        | -0.362         | -0.106           | N/A              | -0.175 | -0.027 | -0.177 | 0.131  | -0.385 | -0.112 | -0.349 | 0.432  | -0.164            | 0.306                     | 0.180  |        |        |       |
| Cr                            | -0.038            | -0.282           | 0.207  | 0.605           | 0.814  | 0.837  | 0.882  | 0.251  | 0.414  | 0.639  | 0.552  | 0.751  | -0.051 | 1.000  | 0.718  | 0.744  | 0.392  | 0.466  | 0.429  | -0.054 | -0.170 | 0.346  | 0.351                        | 0.083                         | 0.259           | 0.521                        | 0.456          | 0.395            | N/A              | -0.184 | 0.284  | -0.149 | 0.062  | -0.284 | -0.191 | -0.445 | 0.223  | 0.325             | 0.025                     | -0.005 |        |        |       |
| Mn                            | 0.167             | -0.375           | 0.618  | 0.903           | 0.868  | 0.869  | 0.761  | 0.594  | 0.488  | 0.900  | 0.769  | 0.842  | 0.226  | 0.718  | 1.000  | 0.910  | 0.046  | 0.550  | 0.854  | 0.270  | -0.292 | 0.248  | 0.652                        | -0.128                        | 0.603           | 0.832                        | 0.028          | 0.655            | N/A              | -0.065 | 0.623  | 0.011  | 0.414  | -0.368 | -0.052 | -0.554 | 0.635  | 0.579             | 0.398                     | -0.257 |        |        |       |
| Fe                            | 0.116             | -0.464           | 0.413  | 0.842           | 0.940  | 0.920  | 0.920  | 0.390  | 0.703  | 0.905  | 0.877  | 0.978  | 0.069  | 0.744  | 0.910  | 1.000  | 0.181  | 0.607  | 0.739  | 0.184  | -0.232 | 0.289  | 0.430                        | -0.113                        | 0.423           | 0.862                        | 0.125          | 0.653            | N/A              | -0.221 | 0.600  | -0.146 | 0.256  | -0.506 | -0.043 | -0.570 | 0.531  | 0.648             | 0.142                     | -0.134 |        |        |       |
| Ni                            | -0.339            | 0.007            | -0.076 | -0.054          | 0.168  | 0.135  | 0.268  | -0.165 | 0.312  | 0.004  | 0.194  | 0.141  | 0.306  | 0.302  | 0.046  | 0.181  | 1.000  | 0.458  | -0.083 | -0.319 | 0.138  | -0.043 | -0.154                       | 0.173                         | -0.159          | -0.052                       | -0.068         | -0.129           | N/A              | -0.319 | -0.080 | -0.525 | 0.026  | -0.477 | -0.388 | -0.335 | -0.150 | -0.033            | -0.305                    | 0.491  |        |        |       |
| Cu                            | 0.061             | -0.272           | 0.161  | 0.546           | 0.600  | 0.575  | 0.696  | 0.252  | 0.551  | 0.532  | 0.666  | 0.544  | 0.043  | 0.466  | 0.550  | 0.807  | 0.458  | 1.000  | 0.436  | 0.011  | -0.099 | 0.243  | 0.222                        | -0.038                        | 0.221           | 0.426                        | -0.098         | 0.417            | N/A              | -0.319 | 0.213  | -0.191 | 0.416  | -0.340 | -0.188 | -0.486 | 0.236  | 0.350             | -0.196                    | -0.063 |        |        |       |
| Zn                            | 0.230             | -0.177           | 0.757  | 0.777           | 0.574  | 0.565  | 0.514  | 0.723  | 0.362  | 0.785  | 0.605  | 0.625  | 0.259  | 0.429  | 0.854  | 0.739  | -0.083 | 0.436  | 1.000  | 0.374  | -0.238 | 0.169  | 0.751                        | -0.313                        | 0.739           | 0.741                        | -0.185         | 0.487            | N/A              | 0.115  | 0.530  | 0.178  | 0.389  | -0.211 | 0.012  | -0.465 | 0.744  | 0.435             | 0.567                     | -0.233 |        |        |       |
| Pb                            | 0.221             | -0.010           | 0.596  | 0.346           | 0.126  | 0.085  | 0.001  | 0.655  | 0.063  | 0.359  | 0.083  | 0.127  | 0.291  | -0.054 | 0.270  | 0.184  | 0.319  | 0.011  | 0.374  | 1.000  | 0.001  | -0.095 | 0.495                        | -0.028                        | 0.337           | 0.337                        | -0.174         | 0.360            | N/A              | 0.435  | -0.102 | 0.420  | -0.059 | 0.208  | 0.398  | 0.217  | 0.523  | -0.059            | 0.170                     | -0.180 |        |        |       |
| Cl <sup>-</sup>               | -0.445            | -0.412           | -0.238 | -0.279          | -0.176 | -0.208 | -0.162 | -0.319 | 0.067  | -0.379 | -0.131 | -0.202 | -0.186 | -0.170 | -0.292 | -0.252 | 0.138  | -0.099 | -0.428 | 0.001  | 1.000  | -0.046 | -0.403                       | 0.915                         | -0.429          | -0.412                       | 0.194          | -0.136           | N/A              | -0.047 | -0.381 | -0.093 | -0.240 | 0.164  | -0.033 | 0.181  | -0.463 | -0.216            | -0.447                    | 0.281  |        |        |       |
| NO <sub>3</sub> <sup>-</sup>  | -0.267            | -0.386           | -0.119 | 0.062           | 0.373  | 0.395  | 0.426  | -0.147 | 0.122  | 0.126  | 0.373  | 0.344  | -0.248 | 0.346  | 0.248  | 0.389  | -0.043 | 0.243  | 0.169  | -0.095 | -0.046 | 1.000  | -0.084                       | 0.227                         | -0.060          | 0.104                        | 0.457          | 0.449            | N/A              | -0.091 | 0.146  | -0.073 | -0.054 | -0.049 | -0.159 | -0.048 | -0.075 | 0.215             | -0.044                    | -0.359 |        |        |       |
| SO <sub>4</sub> <sup>2-</sup> | 0.533             | 0.275            | 0.883  | 0.728           | 0.368  | 0.372  | 0.132  | 0.970  | 0.030  | 0.694  | 0.275  | 0.322  | 0.482  | 0.351  | 0.652  | 0.430  | -0.154 | 0.222  | 0.751  | 0.495  | -0.403 | -0.084 | 1.000                        | -0.326                        | 0.980           | 0.614                        | -0.237         | 0.376            | N/A              | 0.317  | 0.176  | 0.336  | 0.274  | -0.050 | 0.138  | -0.182 | 0.877  | -0.013            | 0.690                     | 0.020  |        |        |       |
| Na <sup>+</sup>               | -0.581            | -0.471           | -0.296 | -0.192          | 0.003  | -0.014 | -0.007 | -0.293 | 0.178  | -0.277 | -0.032 | -0.056 | -0.218 | 0.083  | -0.128 | -0.113 | 0.173  | -0.038 | -0.313 | -0.028 | 0.915  | 0.227  | -0.326                       | 1.000                         | -0.381          | -0.337                       | 0.430          | -0.005           | N/A              | -0.051 | -0.364 | -0.095 | -0.174 | 0.157  | -0.123 | 0.160  | -0.426 | -0.199            | -0.397                    | 0.205  |        |        |       |
| NH <sub>4</sub> <sup>+</sup>  | 0.603             | 0.289            | 0.873  | 0.702           | 0.345  | 0.338  | 0.132  | 0.966  | 0.048  | 0.693  | 0.298  | 0.321  | 0.484  | 0.259  | 0.603  | 0.423  | -0.159 | 0.221  | 0.739  | 0.537  | -0.229 | -0.060 | 0.980                        | -0.381                        | 1.000           | 0.632                        | -0.315         | 0.424            | N/A              | 0.300  | 0.165  | 0.318  | 0.233  | -0.092 | 0.164  | -0.133 | 0.913  | -0.028            | 0.685                     | 0.035  |        |        |       |
| K <sup>+</sup>                | 0.379             | -0.194           | 0.560  | 0.863           | 0.817  | 0.801  | 0.743  | 0.582  | 0.567  | 0.972  | 0.795  | 0.840  | 0.177  | 0.521  | 0.832  | 0.862  | -0.052 | 0.426  | 0.741  | 0.337  | -0.412 | 0.104  | 0.614                        | -0.337                        | 0.632           | 1.000                        | 0.026          | 0.730            | N/A              | 0.059  | 0.673  | 0.141  | 0.419  | -0.354 | 0.217  | -0.365 | 0.817  | 0.644             | 0.375                     | -0.149 |        |        |       |
| Mg <sup>2+</sup>              | -0.467            | -0.261           | -0.405 | -0.031          | 0.286  | 0.316  | 0.257  | -0.315 | 0.170  | 0.011  | 0.117  | 0.331  | -0.362 | 0.456  | 0.028  | 0.125  | -0.088 | -0.038 | -0.185 | -0.174 | 0.194  | 0.457  | -0.237                       | 0.430                         | -0.315          | 0.026                        | 1.000          | 0.110            | N/A              | -0.065 | -0.102 | -0.077 | -0.024 | 0.059  | -0.079 | -0.057 | -0.254 | 0.050             | -0.351                    | -0.080 |        |        |       |
| Ca <sup>2+</sup>              | 0.330             | -0.430           | 0.266  | 0.663           | 0.767  | 0.758  | 0.652  | 0.367  | 0.412  | 0.717  | 0.770  | 0.667  | -0.106 | 0.395  | 0.655  | 0.653  | -0.129 | 0.417  | 0.487  | 0.360  | -0.136 | 0.449  | 0.376                        | -0.005                        | 0.424           | 0.730                        | 0.110          | 1.000            | N/A              | 0.044  | 0.529  | 0.109  | 0.433  | -0.228 | 0.076  | -0.052 | 0.546  | 0.525             | 0.238                     | -0.385 |        |        |       |
| BC                            | 0.207             | 0.410            | 0.389  | -0.068          | -0.249 | -0.237 | -0.209 | 0.381  | -0.180 | 0.039  | -0.266 | -0.230 | -0.175 | -0.184 | -0.065 | -0.221 | -0.319 | -0.219 | 0.115  | 0.435  | -0.047 | -0.091 | 0.317                        | -0.051                        | 0.300           | 0.059                        |                |                  |                  |        |        |        |        |        |        |        |        |                   |                           |        |        |        |       |

(c) Noto (fall/winter)

| Parameter                     | PM <sub>2.5</sub> | PM <sub>10</sub> | LDSC   | OP <sub>1</sub> | Mg     | Al     | Si     | P      | S      | Cl     | K      | Ca     | Ti     | V      | Cr     | Mn     | Fe    | Ni     | Cu     | Zn     | Pb     | CT     | NO <sub>3</sub> <sup>-</sup> | SO <sub>4</sub> <sup>2-</sup> | Na <sup>+</sup> | NH <sub>4</sub> <sup>+</sup> | K <sup>+</sup> | Mg <sup>2+</sup> | Ca <sup>2+</sup> | BC     | OC     | EC     | TC     | OC1    | OC2    | OC3    | OC4    | OC <sub>pro</sub> | EC1 <sub>corrected</sub> | EC2    | EC3    |
|-------------------------------|-------------------|------------------|--------|-----------------|--------|--------|--------|--------|--------|--------|--------|--------|--------|--------|--------|--------|-------|--------|--------|--------|--------|--------|------------------------------|-------------------------------|-----------------|------------------------------|----------------|------------------|------------------|--------|--------|--------|--------|--------|--------|--------|--------|-------------------|--------------------------|--------|--------|
| PM <sub>2.5</sub> mass conc.  | 1.000             | 0.860            | -0.059 | 0.333           | 0.468  | 0.424  | -0.278 | 0.072  | 0.134  | -0.149 | 0.451  | 0.448  | 0.377  | 0.111  | 0.020  | 0.345  | N/A   | N/A    | -0.085 | -0.108 | -0.160 | -0.187 | -0.010                       | -0.041                        | 0.211           | -0.195                       | -0.106         | 0.194            | 0.034            | 0.888  | -0.341 | -0.456 | -0.360 | 0.252  | -0.088 | -0.449 | -0.400 | -0.405            | -0.382                   | -0.408 | -0.192 |
| LDSC conc.                    | 0.860             | 1.000            | -0.226 | 0.265           | 0.438  | 0.390  | -0.274 | 0.382  | 0.430  | -0.274 | 0.382  | 0.430  | 0.506  | 0.178  | -0.025 | 0.301  | N/A   | N/A    | 0.115  | -0.171 | -0.282 | -0.363 | -0.185                       | -0.145                        | 0.029           | -0.241                       | -0.142         | 0.038            | -0.199           | 0.778  | -0.308 | -0.554 | -0.519 | 0.382  | -0.296 | -0.381 | -0.507 | -0.454            | -0.435                   | -0.579 | -0.373 |
| OP <sub>1</sub>               | -0.059            | -0.226           | 1.000  | 0.732           | 0.557  | 0.567  | -0.023 | 0.912  | -0.210 | 0.930  | 0.596  | 0.544  | 0.666  | -0.315 | 0.815  | 0.722  | N/A   | N/A    | 0.312  | 0.899  | 0.887  | 0.207  | 0.494                        | 0.868                         | 0.546           | 0.826                        | 0.740          | 0.534            | 0.774            | -0.012 | 0.640  | 0.718  | 0.637  | -0.486 | 0.300  | 0.615  | 0.762  | 0.820             | 0.789                    | 0.459  | 0.046  |
| Mg                            | 0.333             | 0.265            | 0.732  | 1.000           | 0.917  | 0.905  | -0.324 | 0.864  | -0.184 | 0.665  | 0.951  | 0.912  | 0.912  | 0.216  | -0.277 | 0.884  | 0.970 | N/A    | 0.569  | 0.674  | 0.686  | 0.202  | 0.385                        | 0.625                         | 0.546           | 0.493                        | 0.247          | 0.548            | 0.434            | 0.361  | 0.279  | 0.377  | 0.297  | -0.310 | 0.077  | 0.139  | 0.390  | 0.420             | 0.494                    | 0.141  | -0.153 |
| Al                            | 0.468             | 0.438            | 0.557  | 0.917           | 1.000  | 0.962  | -0.216 | 0.629  | 0.075  | 0.488  | 0.980  | 0.991  | 0.290  | 0.025  | 0.742  | 0.866  | N/A   | 0.560  | 0.480  | 0.413  | -0.068 | 0.351  | 0.497                        | 0.555                         | 0.709           | 0.092                        | 0.560          | 0.443            | 0.530            | 0.041  | 0.093  | 0.050  | -0.020 | -0.061 | -0.096 | 0.137  | 0.188  | 0.232             | -0.099                   | -0.288 |        |
| Si                            | 0.424             | 0.390            | 0.567  | 0.905           | 0.962  | 1.000  | -0.228 | 0.674  | 0.102  | 0.522  | 0.960  | 0.954  | 0.267  | -0.009 | 0.777  | 0.957  | N/A   | 0.644  | 0.548  | 0.427  | -0.147 | 0.259  | 0.514                        | 0.472                         | 0.531           | 0.104                        | 0.438          | 0.369            | 0.459            | 0.189  | 0.230  | 0.197  | -0.050 | 0.170  | -0.094 | 0.148  | 0.226  | 0.280             | 0.120                    | -0.055 |        |
| P                             | -0.278            | -0.283           | -0.029 | -0.324          | -0.216 | -0.228 | 1.000  | -0.380 | 0.604  | 0.209  | -0.389 | -0.177 | -0.248 | 0.442  | -0.134 | -0.215 | N/A   | -0.361 | -0.084 | -0.266 | 0.018  | 0.098  | 0.033                        | 0.034                         | -0.013          | 0.465                        | 0.024          | 0.109            | -0.303           | 0.239  | 0.140  | 0.224  | 0.534  | -0.052 | 0.479  | 0.230  | 0.345  | 0.211             | -0.003                   | 0.078  |        |
| S                             | 0.072             | -0.032           | 0.912  | 0.860           | 0.629  | 0.674  | -0.280 | 1.000  | -0.281 | 0.806  | 0.686  | 0.632  | 0.238  | -0.381 | 0.949  | 0.796  | N/A   | 0.492  | 0.918  | 0.885  | 0.031  | 0.303  | 0.727                        | 0.371                         | 0.783           | 0.467                        | 0.353          | 0.552            | 0.029            | 0.341  | 0.662  | 0.566  | -0.473 | 0.343  | 0.400  | 0.608  | 0.660  | 0.708             | 0.457                    | 0.052  |        |
| Cl                            | 0.134             | 0.323            | -0.210 | -0.184          | 0.075  | 0.102  | 0.604  | -0.381 | 1.000  | -0.107 | -0.069 | 0.073  | 0.229  | 0.711  | -0.107 | -0.016 | N/A   | 0.141  | -0.102 | -0.486 | -0.161 | -0.074 | -0.002                       | -0.031                        | -0.034          | 0.005                        | -0.063         | -0.124           | 0.070            | -0.229 | -0.316 | -0.245 | 0.811  | -0.259 | -0.129 | -0.228 | -0.133 | -0.256            | -0.320                   | -0.131 |        |
| K                             | -0.149            | -0.274           | 0.930  | 0.665           | 0.488  | 0.522  | 0.209  | 0.806  | -0.107 | 1.000  | 0.536  | 0.496  | -0.088 | -0.294 | 0.843  | 0.653  | N/A   | 0.202  | 0.806  | 0.765  | 0.183  | 0.499  | 0.802                        | 0.541                         | 0.732           | 0.854                        | 0.508          | 0.729            | -0.095           | 0.796  | 0.846  | 0.810  | -0.373 | 0.352  | 0.750  | 0.821  | 0.911  | 0.897             | 0.569                    | 0.231  |        |
| Ca                            | 0.431             | 0.382            | 0.596  | 0.951           | 0.980  | 0.960  | -0.289 | 0.686  | -0.069 | 0.536  | 1.000  | 0.973  | 0.178  | -0.147 | 0.773  | 0.974  | N/A   | 0.548  | 0.504  | 0.513  | -0.083 | 0.325  | 0.518                        | 0.545                         | 0.310           | 0.131                        | 0.544          | 0.449            | 0.518            | 0.133  | 0.210  | 0.147  | -0.184 | 0.041  | -0.055 | 0.186  | 0.248  | 0.334             | 0.005                    | -0.208 |        |
| Ti                            | 0.448             | 0.430            | 0.544  | 0.912           | 0.991  | 0.954  | -0.177 | 0.632  | 0.073  | 0.496  | 0.973  | 1.000  | 0.313  | 0.063  | 0.749  | 0.964  | N/A   | 0.546  | 0.494  | 0.404  | -0.121 | 0.292  | 0.433                        | 0.484                         | 0.256           | 0.078                        | 0.491          | 0.380            | 0.497            | 0.046  | 0.109  | 0.057  | 0.031  | -0.050 | -0.094 | 0.115  | 0.188  | 0.246             | -0.080                   | -0.277 |        |
| V                             | 0.377             | 0.506            | 0.666  | 0.216           | 0.290  | 0.267  | -0.248 | 0.338  | 0.229  | -0.088 | 0.178  | 0.313  | 1.000  | 0.448  | 0.243  | 0.270  | N/A   | 0.264  | 0.337  | -0.011 | -0.372 | -0.332 | -0.035                       | -0.225                        | 0.107           | -0.329                       | -0.208         | -0.221           | 0.135            | -0.318 | -0.393 | -0.350 | 0.477  | -0.272 | -0.392 | -0.299 | -0.228 | -0.381            | -0.253                   | -0.362 |        |
| Cr                            | 0.111             | 0.178            | -0.315 | -0.277          | 0.025  | -0.009 | 0.442  | -0.381 | 0.711  | -0.294 | -0.147 | 0.063  | 0.448  | 1.000  | -0.218 | -0.099 | N/A   | 0.030  | -0.158 | -0.389 | -0.104 | -0.152 | -0.367                       | -0.227                        | -0.308          | -0.375                       | -0.279         | -0.227           | -0.308           | 0.037  | -0.378 | -0.565 | -0.496 | 0.949  | -0.319 | -0.376 | -0.507 | -0.470            | -0.380                   | -0.372 | -0.207 |
| Mn                            | 0.020             | -0.025           | 0.915  | 0.884           | 0.742  | 0.777  | -0.134 | 0.949  | -0.107 | 0.843  | 0.773  | 0.749  | 0.243  | -0.218 | 1.000  | 0.885  | N/A   | 0.581  | 0.927  | 0.840  | -0.061 | 0.287  | 0.763                        | 0.591                         | 0.383           | 0.549                        | 0.051          | 0.482            | 0.590            | 0.504  | -0.339 | 0.644  | 0.573  | -0.326 | 0.236  | 0.401  | 0.547  | 0.694             | 0.648                    | 0.518  | 0.085  |
| Fe                            | 0.345             | 0.301            | 0.722  | 0.970           | 0.966  | 0.957  | -0.215 | 0.796  | -0.016 | 0.653  | 0.974  | 0.964  | 0.270  | -0.099 | 0.885  | 1.000  | N/A   | 0.586  | 0.674  | 0.612  | -0.091 | 0.326  | 0.617                        | 0.517                         | 0.470           | 0.248                        | 0.513          | 0.496            | 0.399            | 0.220  | 0.304  | 0.236  | -0.165 | 0.045  | 0.054  | 0.286  | 0.374  | 0.425             | 0.086                    | -0.195 |        |
| Ni                            | N/A               | N/A              | N/A    | N/A             | N/A    | N/A    | N/A    | N/A    | N/A    | N/A    | N/A    | N/A    | N/A    | N/A    | N/A    | N/A    | N/A   | N/A    | 1.000  | 0.472  | 0.304  | -0.126 | -0.013                       | 0.292                         | 0.033           | 0.355                        | 0.166          | 0.034            | 0.020            | -0.010 | -0.024 | 0.092  | -0.004 | -0.059 | -0.014 | -0.257 | 0.026  | 0.056             | 0.074                    | 0.120  | -0.085 |
| Cu                            | -0.085            | 0.115            | 0.312  | 0.569           | 0.560  | 0.644  | -0.361 | 0.492  | 0.141  | 0.202  | 0.548  | 0.546  | 0.264  | 0.030  | 0.581  | 0.586  | N/A   | 0.472  | 1.000  | 0.838  | -0.098 | 0.143  | 0.716                        | 0.180                         | 0.861           | 0.546                        | 0.159          | 0.446            | -0.143           | 0.553  | 0.644  | 0.573  | -0.326 | 0.236  | 0.401  | 0.547  | 0.694  | 0.648             | 0.518                    | 0.085  |        |
| Zn                            | -0.108            | -0.171           | 0.899  | 0.674           | 0.480  | 0.548  | -0.084 | 0.918  | -0.102 | 0.806  | 0.504  | 0.494  | 0.337  | -0.138 | 0.927  | 0.674  | N/A   | 0.472  | 1.000  | 0.838  | -0.098 | 0.143  | 0.716                        | 0.180                         | 0.861           | 0.546                        | 0.159          | 0.446            | -0.143           | 0.553  | 0.644  | 0.573  | -0.326 | 0.236  | 0.401  | 0.547  | 0.694  | 0.648             | 0.518                    | 0.085  |        |
| Pb                            | -0.160            | -0.282           | 0.887  | 0.686           | 0.413  | 0.427  | -0.266 | 0.885  | -0.486 | 0.765  | 0.513  | 0.404  | -0.011 | -0.589 | 0.840  | 0.612  | N/A   | 0.304  | 0.838  | 1.000  | 0.026  | 0.243  | 0.760                        | 0.319                         | 0.838           | 0.575                        | 0.331          | 0.577            | -0.093           | 0.524  | 0.664  | 0.551  | -0.739 | 0.156  | 0.452  | 0.633  | 0.715  | 0.744             | 0.412                    | -0.039 |        |
| CT                            | -0.187            | -0.363           | 0.207  | 0.002           | -0.068 | -0.147 | 0.018  | 0.031  | -0.161 | 0.183  | -0.083 | -0.121 | -0.372 | -0.104 | -0.061 | -0.091 | N/A   | -0.126 | -0.098 | 0.026  | 1.000  | 0.840  | 0.218                        | 0.640                         | -0.024          | 0.316                        | 0.635          | 0.617            | -0.135           | 0.108  | 0.143  | 0.115  | -0.136 | -0.104 | 0.485  | 0.486  | 0.110  | 0.186             | 0.013                    | 0.035  |        |
| NO <sub>3</sub> <sup>-</sup>  | -0.010            | -0.185           | 0.494  | 0.385           | 0.351  | 0.259  | 0.098  | 0.303  | -0.074 | 0.499  | 0.325  | 0.392  | 0.232  | -0.132 | 0.287  | 0.326  | N/A   | -0.013 | 0.143  | 0.243  | 0.840  | 1.000  | 0.559                        | 0.929                         | 0.199           | 0.513                        | 0.921          | 0.872            | 0.029            | 0.337  | 0.327  | 0.338  | -0.201 | -0.048 | 0.653  | 0.737  | 0.445  | 0.544             | 0.038                    | -0.046 |        |
| SO <sub>4</sub> <sup>2-</sup> | -0.041            | -0.145           | 0.868  | 0.625           | 0.497  | 0.514  | 0.033  | 0.727  | -0.002 | 0.802  | 0.518  | 0.433  | 0.326  | 0.107  | -0.375 | 0.768  | 0.470 | N/A    | 0.292  | 0.716  | 0.760  | 0.218  | 0.559                        | 1.000                         | 0.680           | 0.875                        | 0.754          | 0.656            | 0.836            | 0.026  | 0.642  | 0.660  | 0.649  | -0.572 | 0.131  | 0.654  | 0.838  | 0.884             | 0.775                    | 0.512  | 0.096  |
| Na <sup>+</sup>               | -0.195            | -0.241           | 0.826  | 0.493           | 0.270  | 0.351  | -0.013 | 0.783  | -0.034 | 0.732  | 0.310  | 0.236  | 0.107  | -0.375 | 0.768  | 0.470  | N/A   | 0.335  | 0.861  | 0.828  | -0.024 | 0.199  | 0.875                        | 0.269                         | 1.000           | 0.667                        | 0.241          | 0.549            | -0.215           | 0.666  | 0.733  | 0.682  | -0.573 | 0.212  | 0.588  | 0.740  | 0.874  | 0.772             | 0.512                    | 0.096  |        |
| NH <sub>4</sub> <sup>+</sup>  | 0.211             | 0.029            | 0.546  | 0.546           | 0.555  | 0.472  | 0.034  | 0.371  | -0.031 | 0.541  | 0.545  | 0.484  | -0.225 | -0.228 | 0.392  | 0.317  | N/A   | 0.033  | 0.180  | 0.319  | 0.640  | 0.929  | 0.680                        | 1.000                         | 0.269           | 0.517                        | 0.985          | 0.903            | 0.296            | 0.334  | 0.309  | 0.332  | -0.289 | -0.023 | 0.541  | 0.674  | 0.467  | 0.476             | -0.032                   | -0.110 |        |
| K <sup>+</sup>                | -0.306            | -0.442           | 0.740  | 0.247           | 0.092  | 0.104  | 0.465  | 0.467  | 0.005  | 0.834  | 0.131  | 0.078  | -0.329 | -0.279 | 0.501  | 0.248  | N/A   | -0.166 | 0.546  | 0.575  | 0.316  | 0.513  | 0.754                        | 0.517                         | 0.667           | 1.000                        | 0.485          | 0.741            | -0.212           | 0.795  | 0.796  | 0.801  | -0.368 | 0.264  | 0.929  | 0.861  | 0.940  | 0.865             | 0.488                    | 0.251  |        |
| Mg <sup>2+</sup>              | 0.194             | 0.038            | 0.334  | 0.548           | 0.560  | 0.438  | 0.024  | 0.353  | -0.063 | 0.508  | 0.544  | 0.491  | -0.208 | -0.227 | 0.383  | 0.313  | N/A   | 0.034  | 0.159  | 0.331  | 0.635  | 0.921  | 0.656                        | 0.985                         | 0.241           | 0.485                        | 1.000          | 0.904            | 0.305            | 0.225  | 0.216  | 0.225  | -0.291 | -0.179 | 0.500  | 0.637  | 0.439  | 0.430             | -0.137                   | -0.263 |        |
| Ca <sup>2+</sup>              | 0.034             | -0.199           | 0.774  | 0.544           | 0.443  | 0.369  | 0.109  | 0.552  | -0.124 | 0.729  | 0.449  | 0.380  | -0.221 | -0.308 | 0.549  | 0.496  | N/A   | 0.020  | 0.446  | 0.577  | 0.417  | 0.872  | 0.836                        | 0.903                         | 0.549           | 0.741                        | 0.904          | 1.000            | 0.124            | 0.504  | 0.502  | 0.507  | -0.453 | -0.018 | 0.750  | 0.861  | 0.725  | 0.661             | 0.139                    | -0.088 |        |
| BC                            | 0.888             | 0.778            | -0.012 | 0.361           | 0.530  | 0.459  | -0.303 | 0.029  | 0.070  | -0.095 | 0.518  | 0.497  | 0.135  | 0.037  | 0.051  | 0.399  | N/A   | -0.010 | -0.143 | -0.093 | -0.135 | 0.029  | 0.026                        | 0.296                         | -0.215          | -0.212                       | 0.305          | 0.124            | 1.000            | -0.399 | 1.000  | 0.951  | 0.999  | -0.449 | 0.765  | 0.785  | 0.797  | 0.842             | 0.81                     |        |        |

(d) Noto (spring) without the extremely high OP<sub>v</sub><sup>pr</sup> event

| Parameter                     | PM <sub>2.5</sub> | PM <sub>10</sub> | LDSP  | OP <sub>v</sub> | P      | S      | Cl     | K      | Ca    | Ti     | V      | Cr     | Mn     | Fe     | Ni     | Cu     | Zn     | Pb     | Cl <sup>-</sup> | NO <sub>3</sub> <sup>-</sup> | SO <sub>4</sub> <sup>2-</sup> | Na <sup>+</sup> | NH <sub>4</sub> <sup>+</sup> | K <sup>+</sup> | Mg <sup>2+</sup> | Ca <sup>2+</sup> | BC     | OC     | EC     | TC     | OC1   | OC2    | OC3    | OC4    | OC <sub>pro</sub> | EC1 <sub>corrected</sub> | EC2   | EC3    |        |        |
|-------------------------------|-------------------|------------------|-------|-----------------|--------|--------|--------|--------|-------|--------|--------|--------|--------|--------|--------|--------|--------|--------|-----------------|------------------------------|-------------------------------|-----------------|------------------------------|----------------|------------------|------------------|--------|--------|--------|--------|-------|--------|--------|--------|-------------------|--------------------------|-------|--------|--------|--------|
| PM <sub>2.5</sub> mass conc.  | 1.000             | 0.952            | 0.946 | 0.828           | 0.649  | 0.641  | 0.215  | 0.865  | 0.477 | 0.668  | 0.579  | 0.078  | 0.571  | 0.902  | 0.778  | N/A    | 0.787  | 0.804  | 0.675           | 0.153                        | 0.125                         | 0.935           | -0.083                       | 0.948          | 0.810            | -0.045           | 0.217  | 0.843  | 0.973  | 0.609  | 0.967 | -0.351 | 0.929  | 0.804  | 0.816             | 0.934                    | 0.407 | 0.455  | -0.040 |        |
| LDSP conc.                    | 0.552             | 1.000            | 0.870 | 0.790           | 0.468  | 0.435  | 0.019  | 0.945  | 0.305 | 0.529  | 0.424  | -0.063 | 0.571  | 0.805  | 0.625  | N/A    | 0.896  | 0.695  | 0.621           | 0.355                        | 0.270                         | 0.921           | -0.159                       | 0.964          | 0.430            | -0.115           | 0.345  | 0.693  | 0.932  | 0.635  | 0.953 | -0.330 | 0.924  | 0.759  | 0.824             | 0.819                    | 0.235 | 0.606  | 0.162  |        |
| OP <sub>v</sub>               | 0.846             | 0.870            | 1.000 | 0.818           | 0.774  | 0.761  | 0.341  | 0.772  | N/A   | 0.514  | 0.786  | 0.696  | 0.138  | 0.959  | 0.859  | N/A    | 0.665  | 0.836  | 0.616           | 0.148                        | 0.074                         | 0.884           | 0.045                        | 0.877          | 0.815            | 0.009            | 0.113  | 0.868  | 0.899  | 0.564  | 0.894 | -0.546 | 0.849  | 0.728  | 0.717             | 0.894                    | 0.459 | 0.366  | -0.132 |        |
| Mg                            | 0.238             | 0.790            | 0.818 | 1.000           | 0.611  | 0.583  | -0.117 | 0.808  | N/A   | 0.505  | 0.689  | 0.590  | 0.084  | 0.653  | 0.784  | N/A    | 0.663  | 0.808  | 0.799           | -0.138                       | -0.338                        | 0.837           | -0.311                       | 0.836          | 0.818            | -0.285           | -0.121 | 0.737  | 0.758  | 0.195  | 0.721 | -0.263 | 0.758  | 0.381  | 0.380             | 0.751                    | 0.270 | 0.071  | -0.276 |        |
| Al                            | 0.649             | 0.468            | 0.774 | 0.611           | 1.000  | 0.976  | 0.396  | 0.426  | N/A   | 0.607  | 0.877  | 0.899  | 0.141  | 0.560  | 0.858  | N/A    | 0.556  | 0.903  | 0.373           | -0.193                       | -0.142                        | 0.616           | 0.058                        | 0.555          | 0.737            | -0.088           | -0.338 | 0.838  | 0.387  | 0.227  | 0.567 | -0.412 | 0.519  | 0.366  | 0.328             | 0.686                    | 0.487 | -0.038 | -0.502 |        |
| Si                            | 0.441             | 0.435            | 0.761 | 0.583           | 0.976  | 1.000  | 0.409  | 0.371  | N/A   | 0.664  | 0.873  | 0.943  | 0.505  | 0.558  | 0.832  | N/A    | 0.185  | 0.871  | 0.361           | -0.231                       | -0.144                        | 0.546           | 0.008                        | 0.495          | 0.501            | -0.032           | -0.243 | 0.793  | 0.459  | 0.227  | 0.533 | -0.480 | 0.452  | 0.389  | 0.333             | 0.697                    | 0.461 | -0.018 | -0.484 |        |
| P                             | 0.215             | 0.019            | 0.341 | -0.117          | 0.396  | 0.409  | 1.000  | -0.183 | N/A   | 0.204  | 0.259  | 0.196  | 0.148  | -0.353 | 0.337  | N/A    | -0.117 | 0.113  | 0.006           | -0.064                       | 0.097                         | 0.162           | 0.738                        | 0.073          | 0.535            | 0.507            | -0.035 | 0.464  | 0.304  | 0.376  | 0.324 | -0.234 | 0.195  | 0.511  | 0.385             | 0.365                    | 0.650 | -0.043 | -0.230 |        |
| S                             | 0.865             | 0.945            | 0.772 | 0.808           | 0.426  | 0.371  | -0.183 | 1.000  | N/A   | 0.264  | 0.542  | 0.419  | -0.139 | 0.718  | 0.723  | N/A    | 0.858  | 0.660  | 0.713           | 0.239                        | 0.154                         | 0.917           | -0.332                       | 0.957          | 0.291            | -0.368           | 0.166  | 0.609  | 0.846  | 0.422  | 0.829 | -0.269 | 0.905  | 0.534  | 0.671             | 0.682                    | 0.106 | 0.466  | 0.022  |        |
| Cl                            | N/A               | N/A              | N/A   | N/A             | N/A    | N/A    | N/A    | N/A    | N/A   | N/A    | N/A    | N/A    | N/A    | N/A    | N/A    | N/A    | N/A    | N/A    | N/A             | N/A                          | N/A                           | N/A             | N/A                          | N/A            | N/A              | N/A              | N/A    | N/A    | N/A    | N/A    | N/A   | N/A    | N/A    | N/A    | N/A               | N/A                      | N/A   | N/A    | N/A    | N/A    |
| K                             | 0.477             | 0.305            | 0.514 | 0.505           | 0.607  | 0.664  | 0.204  | 0.264  | N/A   | 1.000  | 0.818  | 0.689  | 0.749  | 0.608  | 0.651  | N/A    | 0.157  | 0.493  | 0.530           | -0.184                       | -0.281                        | 0.376           | 0.201                        | 0.345          | 0.779            | 0.349            | -0.177 | 0.694  | 0.418  | 0.352  | 0.426 | -0.025 | 0.243  | 0.325  | 0.287             | 0.700                    | 0.737 | -0.091 | -0.542 |        |
| Ca                            | 0.668             | 0.529            | 0.786 | 0.689           | 0.877  | 0.873  | 0.259  | 0.542  | N/A   | 0.818  | 1.000  | 0.897  | 0.420  | 0.750  | 0.916  | N/A    | 0.408  | 0.765  | 0.610           | -0.120                       | -0.186                        | 0.656           | 0.086                        | 0.612          | 0.615            | -0.005           | -0.289 | 0.829  | 0.602  | 0.302  | 0.590 | -0.398 | 0.523  | 0.344  | 0.373             | 0.730                    | 0.589 | -0.016 | -0.575 |        |
| Ti                            | 0.579             | 0.424            | 0.696 | 0.550           | 0.899  | 0.943  | 0.196  | 0.419  | N/A   | 0.689  | 0.897  | 1.000  | 0.413  | 0.732  | 0.741  | N/A    | 0.220  | 0.804  | 0.341           | -0.125                       | -0.052                        | 0.476           | -0.134                       | 0.455          | 0.359            | -0.101           | -0.159 | 0.658  | 0.450  | 0.204  | 0.438 | -0.552 | 0.366  | 0.281  | 0.291             | 0.604                    | 0.315 | 0.074  | -0.430 |        |
| V                             | 0.718             | -0.063           | 0.138 | 0.084           | 0.141  | 0.305  | 0.148  | -0.139 | N/A   | 0.749  | 0.420  | 0.413  | 1.000  | 0.255  | -0.022 | 0.148  | N/A    | -0.215 | -0.013          | 0.199                        | -0.107                        | -0.162          | -0.133                       | 0.158          | -0.124           | 0.222            | 0.523  | 0.159  | 0.154  | -0.026 | 0.211 | 0.000  | -0.185 | -0.218 | 0.139             | 0.072                    | 0.303 | 0.406  | -0.037 | -0.251 |
| Cr                            | 0.271             | 0.571            | 0.532 | 0.653           | 0.560  | 0.538  | -0.353 | 0.718  | N/A   | 0.608  | 0.750  | 0.732  | 0.255  | 1.000  | 0.513  | N/A    | 0.390  | 0.646  | 0.584           | -0.022                       | -0.051                        | 0.588           | -0.436                       | 0.613          | 0.207            | -0.378           | -0.126 | 0.503  | 0.476  | 0.148  | 0.456 | -0.189 | 0.476  | 0.137  | 0.294             | 0.509                    | 0.120 | 0.158  | -0.340 |        |
| Mn                            | 0.902             | 0.805            | 0.959 | 0.784           | 0.518  | 0.832  | 0.337  | 0.723  | N/A   | 0.406  | 0.749  | 0.741  | -0.022 | 0.513  | 1.000  | N/A    | 0.387  | 0.924  | 0.515           | 0.037                        | 0.045                         | 0.853           | -0.063                       | 0.834          | 0.477            | -0.150           | 0.002  | 0.847  | 0.848  | 0.424  | 0.831 | -0.547 | 0.822  | 0.641  | 0.621             | 0.820                    | 0.346 | 0.288  | -0.171 |        |
| Fe                            | 0.778             | 0.625            | 0.859 | 0.737           | 0.976  | 0.949  | 0.319  | 0.599  | N/A   | 0.651  | 0.916  | 0.889  | 0.148  | 0.669  | 0.909  | N/A    | 0.444  | 0.937  | 0.535           | -0.151                       | -0.130                        | 0.757           | -0.007                       | 0.710          | 0.544            | -0.130           | -0.273 | 0.901  | 0.722  | 0.304  | 0.701 | -0.388 | 0.664  | 0.456  | 0.449             | 0.790                    | 0.504 | 0.045  | -0.477 |        |
| Ni                            | N/A               | N/A              | N/A   | N/A             | N/A    | N/A    | N/A    | N/A    | N/A   | N/A    | N/A    | N/A    | N/A    | N/A    | N/A    | N/A    | N/A    | N/A    | N/A             | N/A                          | N/A                           | N/A             | N/A                          | N/A            | N/A              | N/A              | N/A    | N/A    | N/A    | N/A    | N/A   | N/A    | N/A    | N/A    | N/A               | N/A                      | N/A   | N/A    | N/A    | N/A    |
| Cu                            | 0.387             | 0.896            | 0.665 | 0.665           | 0.756  | 0.185  | -0.117 | 0.958  | N/A   | 0.157  | 0.408  | 0.220  | -0.215 | 0.590  | 0.587  | N/A    | 1.000  | 0.466  | 0.709           | 0.292                        | 0.228                         | 0.888           | -0.201                       | 0.923          | 0.392            | -0.314           | 0.191  | 0.537  | 0.828  | 0.461  | 0.816 | -0.145 | 0.904  | 0.554  | 0.720             | 0.607                    | 0.144 | 0.477  | 0.059  |        |
| Zn                            | 0.804             | 0.695            | 0.836 | 0.808           | 0.903  | 0.871  | 0.113  | 0.660  | N/A   | 0.493  | 0.765  | 0.804  | -0.013 | 0.646  | 0.924  | N/A    | 0.466  | 1.000  | 0.459           | -0.102                       | -0.105                        | 0.756           | -0.228                       | 0.738          | 0.387            | -0.352           | -0.159 | 0.813  | 0.719  | 0.259  | 0.693 | -0.360 | 0.686  | 0.442  | 0.415             | 0.755                    | 0.286 | 0.143  | -0.276 |        |
| Pb                            | 0.675             | 0.621            | 0.616 | 0.799           | 0.773  | 0.361  | 0.006  | 0.713  | N/A   | 0.530  | 0.610  | 0.341  | 0.199  | 0.584  | 0.515  | N/A    | 0.709  | 0.459  | 1.000           | -0.333                       | -0.447                        | 0.777           | -0.164                       | 0.747          | 0.649            | -0.270           | -0.235 | 0.654  | 0.693  | 0.097  | 0.650 | -0.047 | 0.707  | 0.307  | 0.376             | 0.640                    | 0.412 | -0.141 | -0.519 |        |
| Cl <sup>-</sup>               | 0.153             | 0.355            | 0.148 | -0.138          | -0.193 | -0.231 | -0.064 | 0.239  | N/A   | -0.184 | -0.120 | -0.125 | -0.107 | -0.022 | 0.037  | -0.131 | N/A    | 0.392  | -0.102          | -0.333                       | 1.000                         | 0.867           | 0.072                        | 0.260          | 0.168            | -0.177           | 0.393  | 0.736  | -0.097 | 0.156  | 0.719 | 0.227  | -0.222 | 0.147  | 0.426             | 0.501                    | 0.084 | -0.069 | 0.871  | 0.783  |
| NO <sub>3</sub> <sup>-</sup>  | 0.125             | 0.270            | 0.074 | -0.338          | -0.142 | -0.144 | 0.097  | 0.154  | N/A   | -0.281 | -0.186 | -0.052 | -0.162 | -0.051 | 0.045  | -0.130 | N/A    | 0.228  | -0.105          | -0.447                       | 0.867                         | 1.000           | 0.016                        | 0.175          | 0.102            | -0.279           | 0.279  | 0.752  | -0.138 | 0.140  | 0.660 | 0.206  | -0.247 | 0.133  | 0.478             | 0.571                    | 0.038 | -0.159 | 0.883  | 0.747  |
| SO <sub>4</sub> <sup>2-</sup> | 0.935             | 0.921            | 0.884 | 0.837           | 0.616  | 0.546  | 0.162  | 0.917  | N/A   | 0.376  | 0.656  | 0.476  | -0.133 | 0.588  | 0.853  | N/A    | 0.888  | 0.756  | 0.777           | 0.072                        | 0.016                         | 1.000           | -0.072                       | 0.989          | 0.455            | -0.232           | -0.018 | 0.839  | 0.959  | 0.462  | 0.938 | -0.234 | 0.981  | 0.651  | 0.720             | 0.828                    | 0.400 | 0.294  | -0.187 |        |
| Na <sup>+</sup>               | -0.083            | -0.159           | 0.043 | -0.311          | 0.058  | 0.008  | 0.738  | -0.332 | N/A   | 0.201  | 0.086  | -0.134 | 0.158  | -0.456 | -0.063 | -0.007 | N/A    | 0.923  | 0.738           | 0.747                        | 0.168                         | 0.102           | 0.989                        | -0.137         | 1.000            | 0.489            | -0.230 | 0.102  | 0.783  | 0.957  | 0.509 | 0.941  | -0.254 | 0.981  | 0.676             | 0.756                    | 0.821 | 0.321  | 0.405  | -0.069 |
| NH <sub>4</sub> <sup>+</sup>  | 0.448             | 0.964            | 0.877 | 0.836           | 0.555  | 0.495  | 0.073  | 0.957  | N/A   | 0.345  | 0.612  | 0.455  | -0.124 | 0.613  | 0.834  | N/A    | 0.923  | 0.738  | 0.747           | 0.168                        | 0.102                         | 0.989           | -0.137                       | 1.000          | 0.489            | -0.230           | 0.102  | 0.783  | 0.957  | 0.509  | 0.941 | -0.254 | 0.981  | 0.676  | 0.756             | 0.821                    | 0.321 | 0.405  | -0.069 |        |
| K <sup>+</sup>                | 0.510             | 0.430            | 0.615 | 0.518           | 0.743  | 0.501  | 0.553  | 0.291  | N/A   | 0.779  | 0.615  | 0.359  | 0.522  | 0.207  | 0.477  | 0.544  | N/A    | 0.392  | 0.387           | 0.649                        | -0.177                        | -0.279          | 0.545                        | 0.466          | 0.489            | 1.000            | 0.483  | -0.082 | 0.799  | 0.649  | 0.499 | 0.656  | 0.033  | 0.490  | 0.619             | 0.516                    | 0.816 | 0.897  | 0.405  | -0.069 |
| Mg <sup>2+</sup>              | -0.045            | -0.115           | 0.009 | -0.285          | -0.088 | -0.032 | 0.507  | -0.368 | N/A   | 0.349  | -0.005 | -0.101 | 0.523  | -0.278 | -0.150 | -0.130 | N/A    | -0.314 | -0.252          | -0.270                       | 0.593                         | 0.279           | -0.232                       | 0.786          | -0.230           | 0.483            | 1.000  | 0.389  | 0.109  | -0.013 | 0.624 | 0.060  | 0.096  | -0.214 | 0.422             | 0.273                    | 0.231 | 0.598  | 0.246  | 0.231  |
| Ca <sup>2+</sup>              | 0.317             | 0.345            | 0.113 | -0.121          | -0.338 | -0.243 | -0.025 | 0.166  | N/A   | -0.177 | -0.289 | -0.159 | 0.159  | -0.126 | 0.002  | -0.273 | N/A    | 0.191  | -0.159          | -0.255                       | 0.736                         | 0.752           | -0.018                       | -0.037         | 0.102            | -0.082           | 0.389  | 1.000  | -0.207 | 0.166  | 0.629 | 0.226  | -0.283 | 0.106  | 0.555             | 0.551                    | 0.153 | -0.229 | 0.881  | 0.868  |
| BC                            | 0.843             | 0.693            | 0.868 | 0.737           | 0.838  | 0.793  | 0.464  | 0.609  | N/A   | 0.694  | 0.829  | 0.658  | 0.154  | 0.503  | 0.847  | 0.901  | N/A    | 0.537  | 0.813           | 0.654                        | -0.097                        | -0.138          | 0.859                        | 0.247          | 0.783            | 0.999            | 0.109  | -0.207 | 1.000  | 0.860  | 0.500 | 0.851  | -0.150 | 0.773  | 0.652             | 0.615                    | 0.920 | 0.756  | 0.069  | -0.438 |
| OC                            | 0.973             | 0.932            | 0.899 | 0.758           | 0.387  | 0.549  | 0.304  | 0.846  | N/A   | 0.418  | 0.602  | 0.450  | -0.026 | 0.476  | 0.848  | 0.722  | N/A    | 0.828  | 0.719           | 0.693                        | 0.156                         | 0.140           | 0.959                        | 0.047          | 0.957            | 0.649            | -0.013 | 0.166  | 0.860  | 1.000  | 0.638 | 0.996  | -0.221 | 0.969  | 0.833             | 0.856                    | 0.917 | 0.492  | 0.421  | -0.064 |
| EC                            | 0.609             | 0.635            | 0.564 | 0.195           | 0.227  | 0.227  | 0.376  | 0.422  | N/A   | 0.352  | 0.302  | 0.204  | 0.211  | 0.148  | 0.424  | 0.304  | N/A    | 0      |                 |                              |                               |                 |                              |                |                  |                  |        |        |        |        |       |        |        |        |                   |                          |       |        |        |        |
